# Supplementary material
Source: PubMed Central journal article supplement (PMC4995955)
Supplement: pnas.1605901113.sapp.pdf [file pnas.1605901113.sapp.pdf]

## Supporting Information for

# Beyond the mouse model: A transdisciplinary approach to the genetics of hominid dental evolution

Leslea J. Hlusko<sup>1\*</sup>  
Christopher A. Schmitt<sup>1,2</sup>  
Tesla A. Monson<sup>1</sup>  
Marianne F. Brasil<sup>1</sup>  
Michael C. Mahaney<sup>3</sup>

<sup>1</sup>Human Evolution Research Center, Department of Integrative Biology MC-3140  
University of California Berkeley, Berkeley, CA 94720 USA

<sup>2</sup>Department of Anthropology, Boston University, 232 Bay State Road, Boston, MA 02215 USA

<sup>3</sup>South Texas Diabetes and Obesity Institute, School of Medicine  
University of Texas Rio Grande Valley, Brownsville, TX 78520 USA

\* Corresponding author email: [hlusko@berkeley.edu](mailto:hlusko@berkeley.edu)

### **This PDF file includes:**

Tables S1 – S11

Figures S1 – S4

**Table S1.** Sample of extant Old World Monkeys used in this study.

| <b>Subfamily</b> | <b>Genus and Species</b>    | <b>N</b>                                        | <b>Museum</b>                                    |
|------------------|-----------------------------|-------------------------------------------------|--------------------------------------------------|
| Cercopithecinae  | <i>Cercopithecus mitis</i>  | 55                                              | American Museum of Natural History <sup>1</sup>  |
|                  |                             | 2                                               | Cleveland Museum of Natural History <sup>2</sup> |
|                  |                             | 1                                               | Museum of Vertebrate Zoology <sup>3</sup>        |
|                  |                             | 37                                              | National Museum of Natural History <sup>4</sup>  |
|                  | <i>Macaca fascicularis</i>  | 87                                              | American Museum of Natural History <sup>1</sup>  |
|                  |                             | 5                                               | Cleveland Museum of Natural History <sup>2</sup> |
|                  |                             | 5                                               | Museum of Vertebrate Zoology <sup>3</sup>        |
|                  | <i>Macaca mulatta</i>       | 3                                               | Museum of Vertebrate Zoology <sup>3</sup>        |
|                  |                             | 73                                              | National Museum of Natural History <sup>4</sup>  |
|                  | <i>Papio hamadryas</i>      | 4                                               | American Museum of Natural History <sup>1</sup>  |
|                  |                             | 27                                              | Cleveland Museum of Natural History <sup>2</sup> |
|                  |                             | 55                                              | National Museum of Natural History <sup>4</sup>  |
|                  |                             | 41                                              | Museum of Vertebrate Zoology <sup>3</sup>        |
|                  | <i>Theropithecus gelada</i> | 4                                               | American Museum of Natural History <sup>1</sup>  |
|                  |                             | 1                                               | Cleveland Museum of Natural History <sup>2</sup> |
| 5                |                             | National Museum of Natural History <sup>4</sup> |                                                  |
| Colobinae        | <i>Colobus guereza</i>      | 53                                              | American Museum of Natural History <sup>1</sup>  |
|                  |                             | 4                                               | Cleveland Museum of Natural History <sup>2</sup> |
|                  |                             | 68                                              | National Museum of Natural History <sup>4</sup>  |
|                  | <i>Nasalis larvatus</i>     | 28                                              | American Museum of Natural History <sup>1</sup>  |
|                  |                             | 2                                               | Cleveland Museum of Natural History <sup>2</sup> |
|                  | <i>Presbytis melalophos</i> | 58                                              | American Museum of Natural History <sup>1</sup>  |
|                  |                             | 25                                              | National Museum of Natural History <sup>4</sup>  |
|                  | <i>Presbytis rubicunda</i>  | 36                                              | American Museum of Natural History <sup>1</sup>  |
|                  |                             | 44                                              | National Museum of Natural History <sup>4</sup>  |
| <b>Total</b>     |                             | <b>723</b>                                      |                                                  |

<sup>1</sup>New York City, New York, USA; <sup>2</sup>Cleveland, Ohio, USA; <sup>3</sup>Berkeley, California, USA; <sup>4</sup>Washington, District of Columbia, USA

**Table S2.** Descriptive statistics of PMM and MMC extant Old World primates (Cercopithecidae and Hominidae).

|                       | <b>Species</b>              | <b>Trait</b> | <b>N</b> | <b>Mean</b> | <b>SD</b> | <b>CV</b> |
|-----------------------|-----------------------------|--------------|----------|-------------|-----------|-----------|
| Cercopithecinae       | <i>Cercopithecus mitis</i>  | PMM          | 88       | 1.22        | 0.08      | 0.525     |
|                       |                             | MMC          | 85       | 1.10        | 0.06      | 0.327     |
|                       | <i>Macaca fascicularis</i>  | PMM          | 94       | 1.39        | 0.08      | 0.460     |
|                       |                             | MMC          | 77       | 1.42        | 0.10      | 0.704     |
|                       | <i>Macaca mulatta</i>       | PMM          | 75       | 1.42        | 0.07      | 0.345     |
|                       |                             | MMC          | 67       | 1.50        | 0.12      | 0.960     |
|                       | <i>Papio hamadryas</i>      | PMM          | 104      | 1.49        | 0.08      | 0.430     |
|                       |                             | MMC          | 63       | 1.52        | 0.10      | 0.658     |
|                       | <i>Theropithecus gelada</i> | PMM          | 9        | 1.58        | 0.09      | 0.513     |
|                       |                             | MMC          | 8        | 1.60        | 0.13      | 1.056     |
| Colobinae             | <i>Colobus guereza</i>      | PMM          | 118      | 1.06        | 0.07      | 0.462     |
|                       |                             | MMC          | 118      | 1.35        | 0.07      | 0.363     |
|                       | <i>Nasalis larvatus</i>     | PMM          | 27       | 1.25        | 0.06      | 0.288     |
|                       |                             | MMC          | 28       | 1.41        | 0.09      | 0.574     |
|                       | <i>Presbytis melalophos</i> | PMM          | 80       | 1.09        | 0.08      | 0.587     |
|                       |                             | MMC          | 78       | 1.12        | 0.08      | 0.571     |
|                       | <i>Presbytis rubicunda</i>  | PMM          | 77       | 1.04        | 0.06      | 0.346     |
|                       |                             | MMC          | 77       | 1.12        | 0.05      | 0.223     |
| Hominoidea            | <i>Gorilla gorilla</i>      | PMM          | 45       | 1.50        | 0.06      | 0.240     |
|                       |                             | MMC          | 41       | 1.11        | 0.07      | 0.441     |
|                       | <i>Homo sapiens</i>         | PMM          | 25       | 1.58        | 0.10      | 0.633     |
|                       |                             | MMC          | 31       | 0.98        | 0.07      | 0.500     |
|                       | <i>Pan paniscus</i>         | PMM          | 37       | 1.49        | 0.10      | 0.671     |
|                       |                             | MMC          | 32       | 0.96        | 0.06      | 0.375     |
|                       | <i>Pan troglodytes</i>      | PMM          | 59       | 1.49        | 0.08      | 0.430     |
|                       |                             | MMC          | 54       | 0.99        | 0.05      | 0.253     |
| <i>Pongo pygmaeus</i> | PMM                         | 10           | 1.30     | 0.07        | 0.377     |           |
|                       | MMC                         | 8            | 0.99     | 0.05        | 0.253     |           |

**Table S3.** Spearman correlation between PMM and MMC for extant primates.

| <b>Species</b>              | <b>p value</b> | <b>Spearman rho</b> |
|-----------------------------|----------------|---------------------|
| <i>Cercopithecus mitis</i>  | 0.6137         | 0.0568              |
| <i>Colobus guereza</i>      | 0.3906         | -0.0818             |
| <i>Gorilla gorilla</i>      | 0.7616         | -0.0489             |
| <i>Homo sapiens</i>         | 0.3467         | -0.2161             |
| <i>Macaca fascicularis</i>  | 0.5622         | -0.0683             |
| <i>Macaca mulatta</i>       | 0.1854         | -0.1636             |
| <i>Nasalis larvatus</i>     | 0.9516         | 0.0131              |
| <i>Papio hamadryas</i>      | 0.3871         | 0.1176              |
| <i>Pan paniscus</i>         | 0.0234         | -0.4127*            |
| <i>Pan troglodytes</i>      | 0.2971         | 0.1445              |
| <i>Pongo pygmaeus</i>       | 0.7033         | 0.1667              |
| <i>Presbytis melalophos</i> | 0.2777         | 0.1259              |
| <i>Presbytis rubicunda</i>  | 0.1079         | 0.1884              |
| <i>Theropithecus gelada</i> | 0.9063         | -0.0714             |

\*Significantly correlated.

**Table S4.** Sample of extinct Old World Monkey specimens and taxonomic categories.

| <b>Family</b>      | <b>Subfamily</b>   | <b>Species</b>                         | <b>N</b>  | <b>Reference</b> |
|--------------------|--------------------|----------------------------------------|-----------|------------------|
| Cercopithecidae    | Cercopithecinae    | <i>Papio hamadryas ssp.</i>            | 6         | 1                |
|                    |                    | <i>Pliopapio alemui</i>                | 5         | 2                |
|                    |                    | <i>Theropithecus oswaldi cf. darti</i> | 8         | 3                |
|                    | Colobinae          | <i>Colobus sp.</i>                     | 25        | 1                |
|                    |                    | <i>Kuseracolobus aramisi</i>           | 3         | 2                |
|                    |                    | <i>Paracolobus enkorikae</i>           | 6         | 4                |
| Victoriapithecidae | Victoriapithecinae | <i>Victoriapithecus macinnesi</i>      | 3         | 5                |
| <b>Total</b>       |                    |                                        | <b>56</b> |                  |

**Table S5.** Descriptive statistics for PMM and MMC of extinct Old World Monkeys.

| <b>Species</b>                                | <b>Trait</b> | <b>N</b> | <b>Mean</b> | <b>SD</b> | <b>CV</b> |
|-----------------------------------------------|--------------|----------|-------------|-----------|-----------|
| <i>Colobus</i> sp.                            | PMM          | 17       | 1.33        | 0.11      | 0.910     |
|                                               | MMC          | 12       | 1.31        | 0.05      | 0.191     |
| <i>Kuseracolobus aramisi</i>                  | PMM          | 1        | 1.39        | NA        | NA        |
|                                               | MMC          | 1        | 1.46        | NA        | NA        |
| <i>Papio hamadryas</i> ssp.                   | PMM          | 6        | 1.42        | 0.20      | 2.817     |
|                                               | MMC          | 4        | 1.65        | 0.14      | 1.188     |
| <i>Paracolobus enkorikae</i>                  | PMM          | 2        | 1.27        | 0.17      | 2.276     |
|                                               | MMC          | 3        | 1.32        | 0.11      | 0.917     |
| <i>Pliopapio alemui</i>                       | PMM          | 1        | 1.56        | NA        | NA        |
|                                               | MMC          | 1        | 1.38        | NA        | NA        |
| <i>Theropithecus oswaldi</i> cf. <i>darti</i> | PMM          | 8        | 1.56        | 0.17      | 1.853     |
|                                               | MMC          | 8        | 1.72        | 0.14      | 1.140     |
| <i>Victoriapithecus macinnesi</i>             | PMM          | 3        | 1.20        | 0.12      | 1.200     |
|                                               | MMC          | 3        | 1.41        | 0.06      | 0.255     |

**Table S6.** Sample of extant apes and humans.

| <b>Species</b>         | <b>N</b>   | <b>Museum</b>                                    |
|------------------------|------------|--------------------------------------------------|
| <i>Gorilla gorilla</i> | 45         | Cleveland Museum of Natural History <sup>1</sup> |
| <i>Homo sapiens</i>    | 46         | Hearst Museum of Anthropology <sup>2</sup>       |
| <i>Pan paniscus</i>    | 39         | Royal Museum of Central Africa <sup>3</sup>      |
| <i>Pan troglodytes</i> | 59         | Cleveland Museum of Natural History <sup>1</sup> |
| <i>Pongo pygmaeus</i>  | 10         | Cleveland Museum of Natural History <sup>1</sup> |
| <b>Total</b>           | <b>199</b> |                                                  |

<sup>1</sup>Cleveland, Ohio, USA; <sup>2</sup>Berkeley, California, USA; <sup>3</sup>Tervuren, Belgium

**Table S7:** Extinct hominoid taxa studied.

|                                 | <b>Genus</b>            | <b>Species</b>            | <b>N</b>   | <b>Reference</b> |
|---------------------------------|-------------------------|---------------------------|------------|------------------|
| <b>extinct Hominidae</b>        | <i>Ardipithecus</i>     | <i>ramidus</i> *          | 3          | 6                |
|                                 | <i>Australopithecus</i> | <i>afarensis</i> *        | 16         | 6, 8             |
|                                 |                         | <i>africanus</i> *        | 10         | 6                |
|                                 |                         | <i>anamensis</i> *        | 4          | 6, 9             |
|                                 |                         | <i>boisei</i> *           | 7          | 10               |
|                                 |                         | <i>garhi</i> *            | 2          | 6                |
|                                 |                         | <i>robustus</i> *         | 13         | 6                |
|                                 | <i>Homo</i>             | <i>antecessor</i>         | 3          | 11               |
|                                 |                         | <i>erectus</i>            | 15         | 10, 12-17        |
|                                 |                         | <i>heidelbergensis</i>    | 3          | 18, 19           |
|                                 |                         | <i>neanderthalensis</i> * | 11         | 20               |
|                                 |                         | <i>sapiens</i> (archaic)* | 2          | 6                |
|                                 |                         | <i>sp.</i> (Dmanisi)      | 2          | 21, 22           |
| <i>sp.</i> (Sima)               |                         | 24                        | 23, 24     |                  |
| <b>other extinct hominoids†</b> | <i>Afropithecus</i>     | <i>turkanensis</i>        | 1          | 25               |
|                                 | <i>Ankarapithecus</i>   | <i>metei</i>              | 1          | 26               |
|                                 | <i>Dryopithecus</i>     | <i>sp.</i> *              | 6          | 6                |
|                                 | <i>Griphopithecus</i>   | <i>alpani</i>             | 1          | 27               |
|                                 | <i>Kenyapithecus</i>    | <i>africanus</i>          | 3          | 28-30            |
|                                 | <i>Khoratpithecus</i>   | <i>piriyai</i>            | 1          | 31               |
|                                 | <i>Limnopithecus</i>    | <i>legetet</i>            | 4          | 32, 33           |
|                                 | <i>Micropithecus</i>    | <i>clarki</i>             | 2          | 32               |
|                                 | <i>Ouranopithecus</i>   | <i>macedoniensis</i>      | 4          | 34               |
|                                 | <i>Proconsul</i>        | <i>africanus</i>          | 4          | 33, 35           |
|                                 |                         | <i>heseloni</i>           | 6          | 36               |
|                                 |                         | <i>major</i>              | 6          | 35-37            |
|                                 |                         | <i>nyanzae</i>            | 5          | 33, 35, 36       |
|                                 | <i>Rangwapithecus</i>   | <i>gordoni</i>            | 3          | 38, 39           |
| <i>Sivapithecus</i>             | <i>indicus</i>          | 3                         | 35, 40     |                  |
| <b>Total</b>                    |                         |                           | <b>165</b> |                  |

\*includes data from Suwa and colleagues (6) and references therein.

†see controversies over familial designations in Hartwig (7).

*Notes for Table S7:* The fossil hominoid linear dental metric data are from G. Suwa and T. White, following (6) and references therein, and from fossil descriptions in the literature. Data were collected for a specimen only if all measurements needed to calculate MMC and PMM values were preserved from the same side of the dentition. Where measurements for both sides were reported, only the left side measurements were collected. Measurements reported as estimates were not collected. The limited and unequal representation of fossil taxa in our sample is the result of the relatively incomplete fossil material available, precluding the collection of the multiple metrics required to describe the MMC and PMM phenotypes. Specimens from Kelley et al. (41) described as *Equatorius africanus* by the authors are included here as *Kenyapithecus africanus* (following 42). Specimens from Pickford et al. (36) described as *Ugandapithecus major* by the authors are included here as *Proconsul major* (43). Only *Homo* specimens with a clearly defined taxonomic affinity were included (e.g., OH 7 and OH 13, for which taxonomic affinity remains debated, were excluded). The Dmanisi mandible (D211) was excluded as it was deemed potentially unrepresentative of the Dmanisi sample in terms of molar proportions (18).

**Table S8.** Descriptive statistics for MMC and PMM of extinct hominoids used in this study with taxon sample sizes greater than two. See Table S7 for a complete list with references (all data were culled from published literature).

| <b>Species</b>                    | <b>Trait</b> | <b>N</b> | <b>Mean</b> | <b>SD</b> | <b>CV</b> |
|-----------------------------------|--------------|----------|-------------|-----------|-----------|
| <i>Ardipithecus ramidus</i>       | PMM          | 3        | 1.68        | 0.05      | 0.149     |
|                                   | MMC          | 3        | 1.16        | 0.02      | 0.034     |
| <i>Australopithecus afarensis</i> | PMM          | 14       | 1.51        | 0.07      | 0.325     |
|                                   | MMC          | 12       | 1.15        | 0.06      | 0.313     |
| <i>Australopithecus africanus</i> | PMM          | 8        | 1.48        | 0.05      | 0.169     |
|                                   | MMC          | 5        | 1.15        | 0.09      | 0.704     |
| <i>Au. anamensis</i>              | PMM          | 2        | 1.59        | 0.13      | 1.063     |
|                                   | MMC          | 3        | 1.17        | 0.08      | 0.547     |
| <i>Australopithecus boisei</i>    | PMM          | 5        | 1.31        | 0.07      | 0.374     |
|                                   | MMC          | 7        | 1.22        | 0.10      | 0.820     |
| <i>Australopithecus robustus</i>  | PMM          | 12       | 1.43        | 0.08      | 0.448     |
|                                   | MMC          | 9        | 1.16        | 0.06      | 0.310     |
| <i>Homo erectus</i>               | PMM          | 11       | 1.51        | 0.08      | 0.424     |
|                                   | MMC          | 9        | 0.98        | 0.12      | 1.469     |
| <i>Homo heidelbergensis</i>       | PMM          | 2        | 1.62        | 0.11      | 0.747     |
|                                   | MMC          | 3        | 1.03        | 0.04      | 0.155     |
| <i>Homo neanderthalensis</i>      | PMM          | 11       | 1.61        | 0.10      | 0.621     |
|                                   | MMC          | 8        | 0.98        | 0.06      | 0.367     |
| <i>Homo sp.(Sima)</i>             | PMM          | 18       | 1.57        | 0.08      | 0.408     |
|                                   | MMC          | 17       | 1.02        | 0.08      | 0.627     |
| <i>Ouranopith. macedoniensis</i>  | PMM          | 4        | 1.60        | 0.09      | 0.506     |
|                                   | MMC          | 4        | 1.30        | 0.06      | 0.277     |
| <i>Proconsul africanus</i>        | PMM          | 3        | 1.55        | 0.12      | 0.929     |
|                                   | MMC          | 3        | 1.36        | 0.01      | 0.007     |
| <i>Proconsul heseloni</i>         | PMM          | 6        | 1.63        | 0.11      | 0.742     |
|                                   | MMC          | 4        | 1.38        | 0.09      | 0.587     |
| <i>Proconsul major</i>            | PMM          | 4        | 1.55        | 0.06      | 0.232     |
|                                   | MMC          | 5        | 1.44        | 0.08      | 0.444     |
| <i>Proconsul nyanzae</i>          | PMM          | 5        | 1.49        | 0.19      | 2.423     |
|                                   | MMC          | 4        | 1.45        | 0.08      | 0.441     |
| <i>Rangwapithecus gordonii</i>    | PMM          | 3        | 1.53        | 0.14      | 1.281     |
|                                   | MMC          | 3        | 1.31        | 0.21      | 3.366     |

**Table S9.** Results from single-trait phylogenetic generalized least squares regressions of MMC and PMM.\*

| Trait                                               | Pagel's $\lambda$ | Lower 95% CI | Upper 95% CI |
|-----------------------------------------------------|-------------------|--------------|--------------|
| <b>Cercopithecoids Only</b>                         |                   |              |              |
| MMC                                                 | 0.90              | 0.81         | 0.99         |
| PMM                                                 | 0.91              | 0.79         | 1.00         |
| P4 Crown Area: M1 Crown Area                        | 0.63              | 0.40         | 0.85         |
| P4 Length : M1 Length                               | 0.82              | 0.66         | 0.96         |
| M1 Crown Area                                       | 0.97              | 0.93         | 0.99         |
| PMMw                                                | 0.84              | 0.71         | 0.97         |
| MMCw                                                | 0.91              | 0.80         | 0.99         |
| P4 Length                                           | 0.97              | 0.91         | 1.00         |
| M1 Length                                           | 0.98              | 0.95         | 1.00         |
| M2 Length                                           | 0.98              | 0.95         | 1.00         |
| M2 Width                                            | 0.97              | 0.93         | 0.99         |
| M3 Length                                           | 0.98              | 0.95         | 1.00         |
| <b>Cercopithecoids + Hominoids (without humans)</b> |                   |              |              |
| MMC                                                 | 0.88              | 0.80         | 0.96         |
| PMM                                                 | 0.92              | 0.86         | 0.98         |
| P4 Crown Area: M1 Crown Area                        | 0.69              | 0.52         | 0.87         |
| P4 Length : M1 Length                               | 0.84              | 0.73         | 0.95         |
| M1 Crown Area                                       | 0.98              | 0.96         | 0.99         |
| PMMw                                                | 0.75              | 0.59         | 0.90         |
| MMCw                                                | 0.81              | 0.69         | 0.93         |
| P4 Length                                           | 0.97              | 0.94         | 0.99         |
| M1 Length                                           | 0.98              | 0.96         | 0.99         |
| M2 Length                                           | 0.99              | 0.98         | 1.00         |
| M2 Width                                            | 0.98              | 0.96         | 0.99         |
| M3 Length                                           | 0.98              | 0.96         | 0.99         |

\*Pagel's  $\lambda$  is understood to be a measure of phylogenetic signal. A value of 1 indicates that trait values vary in accordance with the phylogenetic tree space, in turn indicating that traits are changing across the tree in a manner consistent with a Brownian motion model of evolution. P4 = fourth mandibular premolars. M1, 2, or 3 = first, second, or third mandibular molar. Length = mesiodistal breadth of the crown. Width = buccolingual breadth of the crown. PMMw = PMM calculated with widths rather than lengths. MMCw = MMC calculated with widths rather than lengths.



**Table S10.** Results from Morphological Disparity Through Time analysis for extant catarrhine taxa measured in this study.\*

| <b>Trait</b>                                 | <b>MDI</b> | <b>p-value</b> |
|----------------------------------------------|------------|----------------|
| Cercopithecoids + Hominoids (without humans) |            |                |
| MMC                                          | -0.107     | 0.093          |
| PMM                                          | -0.126     | 0.074          |
| P4 Crown Area: M1 Crown Area                 | -0.249     | <0.001         |
| P4 Length : M1 Length                        | -0.218     | 0.001          |
| M1 Crown Area                                | 0.042      | 0.351          |
| PMMw                                         | -0.250     | <0.001         |
| MMCw                                         | 0.033      | 0.381          |

\*MDI = morphological disparity index. P4 = fourth mandibular premolars. M1, 2, or 3 = first, second, or third mandibular molar. Length = mesiodistal breadth of the crown. Width = buccolingual breadth of the crown. PMMw = PMM calculated with widths rather than lengths. MMCw = MMC calculated with widths rather than lengths.

**Table S11.** Divergence dates inferred from *10kTrees* dataset, with published ranges from other molecular studies.

| <b>Node</b> | <b>Divergence</b>                         | <b><i>10kTrees</i><br/>Consensus<br/>Date</b> | <b>Published<br/>Range</b> | <b>Source(s)</b> |
|-------------|-------------------------------------------|-----------------------------------------------|----------------------------|------------------|
| 1           | Hominoidea/Cercopithecoidea               | 30.00 Ma                                      | 38 – 20 Ma                 | 44, 45           |
| 2           | Cercopithecinae/Colobinae                 | 21.41 Ma                                      | 22.9 – 13.22 Ma            | 44 – 47          |
| 3           | Papionini/Cercopithecini                  | 14.88 Ma                                      | 15.0 – 9.2 Ma              | 44 – 46          |
| 4           | <i>Macaca/Papio</i>                       | 7.08 Ma                                       | 10.9 – 6.7 Ma              | 44, 45, 47       |
| 5           | <i>Papio/Theropithecus</i>                | 5.77 Ma                                       | 4.7 – 3.4 Ma               | 44               |
| 6           | <i>M. mulatta/M. fascicularis</i>         | 5.05 Ma                                       | 5.5 – 3.3 Ma               | 44, 48           |
| 7           | Colobini/Presbytini                       | 15.44 Ma                                      | 15.1 – 9.2 Ma              | 44, 47           |
| 8           | <i>Presbytis/Nasalis</i>                  | 13.31 Ma                                      | 11.2 – 6.5 Ma              | 44, 47           |
| 9*          | <i>Pr. melalophos/Pr. rubicunda</i>       | 1.31 Ma                                       | 2.5 – 0.9 Ma               | 49 – 51          |
| 10          | Homininae/Ponginae                        | 15.13 Ma                                      | 19.7 – 13.5 Ma             | 44               |
| 11          | <i>Gorilla</i> from <i>Pan</i> /Hominidae | 8.65 Ma                                       | 10.1 – 6.6 Ma              | 44, 45           |
| 12          | <i>Pan</i> /Hominidae                     | 6.18 Ma                                       | 8.0 – 5.4 Ma               | 44               |
| 13          | <i>Pa. troglodytes/Pa. paniscus</i>       | 2.33 Ma                                       | 3.2 – 1.3 Ma               | 44, 45           |

Supporting Information, Figures

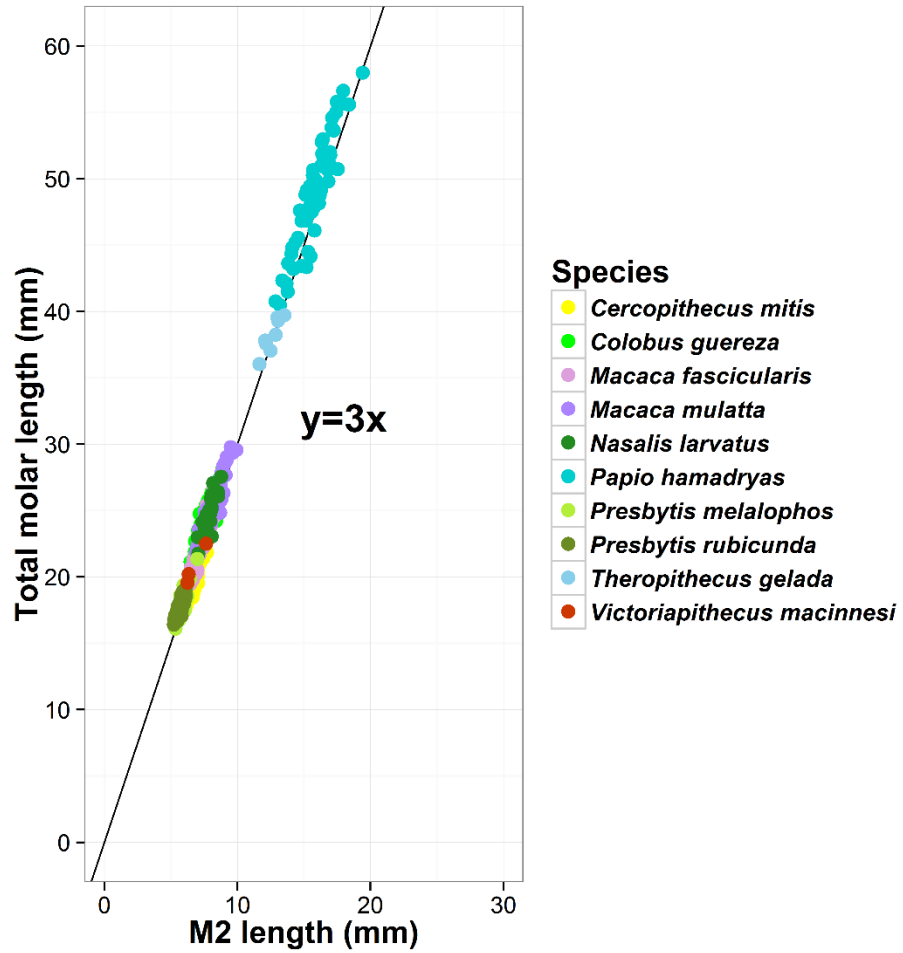

**Fig. S1.** Correlation of mandibular M2 mesiodistal length with the mesiodistal length of the total molar row length (M1+M2+M3).

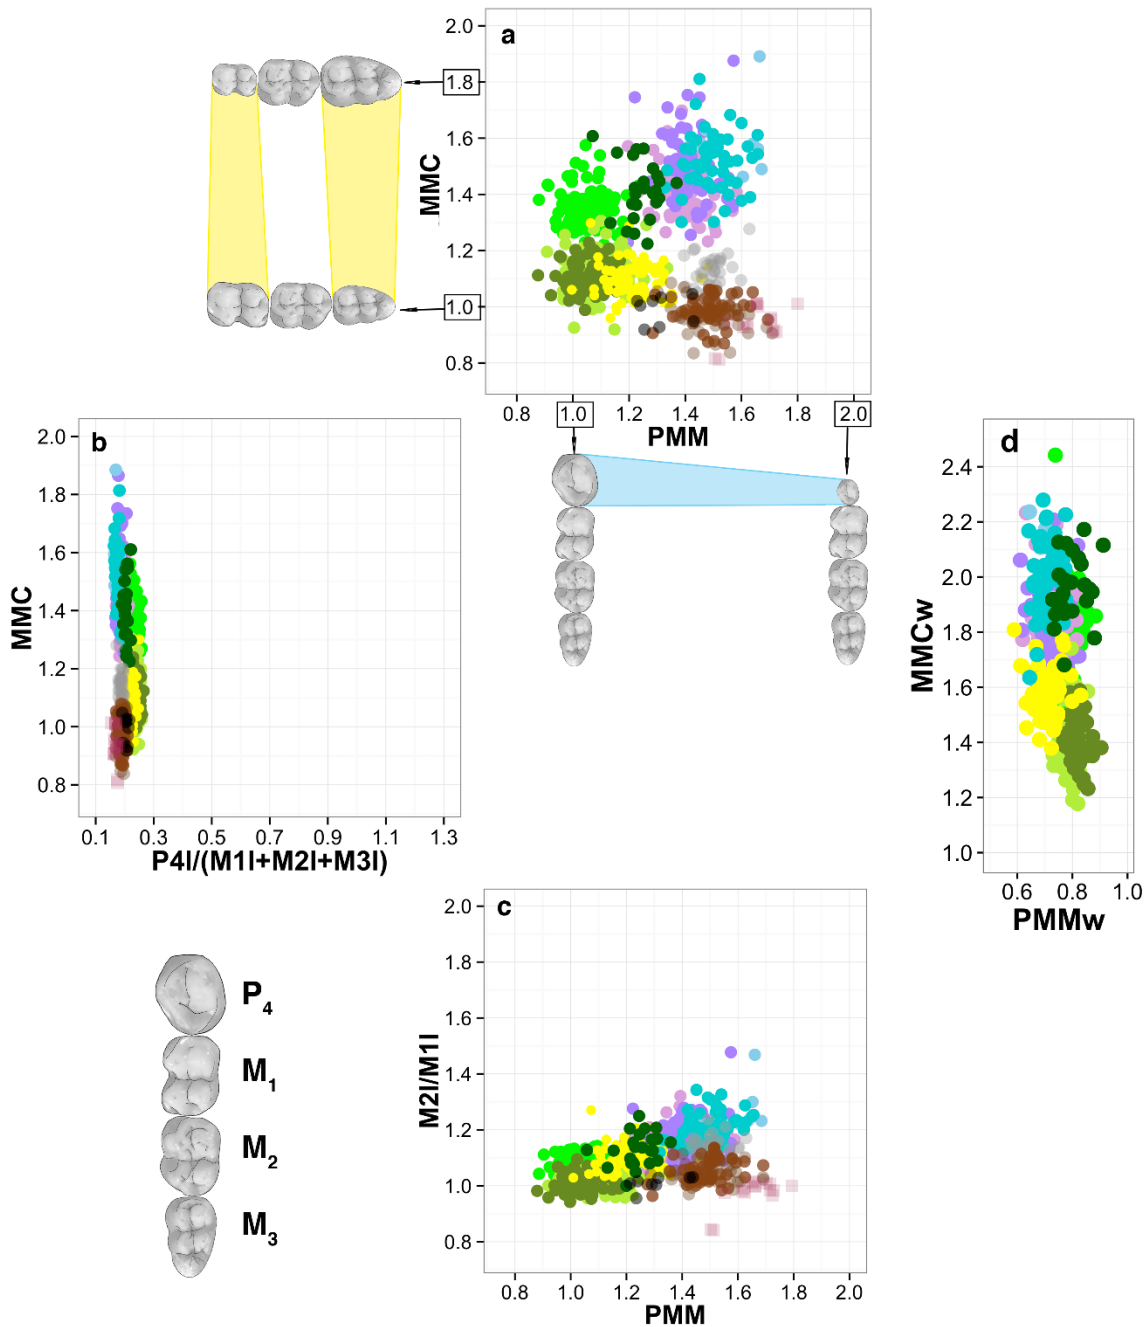

**Fig. S2.** PMM and MMC compared to other methods for capturing the GP within and between the premolar and molar genetic modules across Old World primates; a) PMM and MMC for all extant taxa presented in Figures 1b and 2a, following those same color schemes; b) MMC plotted against the mesiodistal length of P4 divided by the sum of the mesiodistal lengths of the three molars (note that the taxonomic pattern is reversed because the denominator is larger than the numerator, unlike the other ratios); c) the PMM plotted against the mesiodistal length of M2/M1; d) PMM and MMC calculated with buccolingual widths instead of mesiodistal lengths. These other ratios return the same pattern of relationships between taxa, but the PMM and MMC in a) yields the best discrimination.

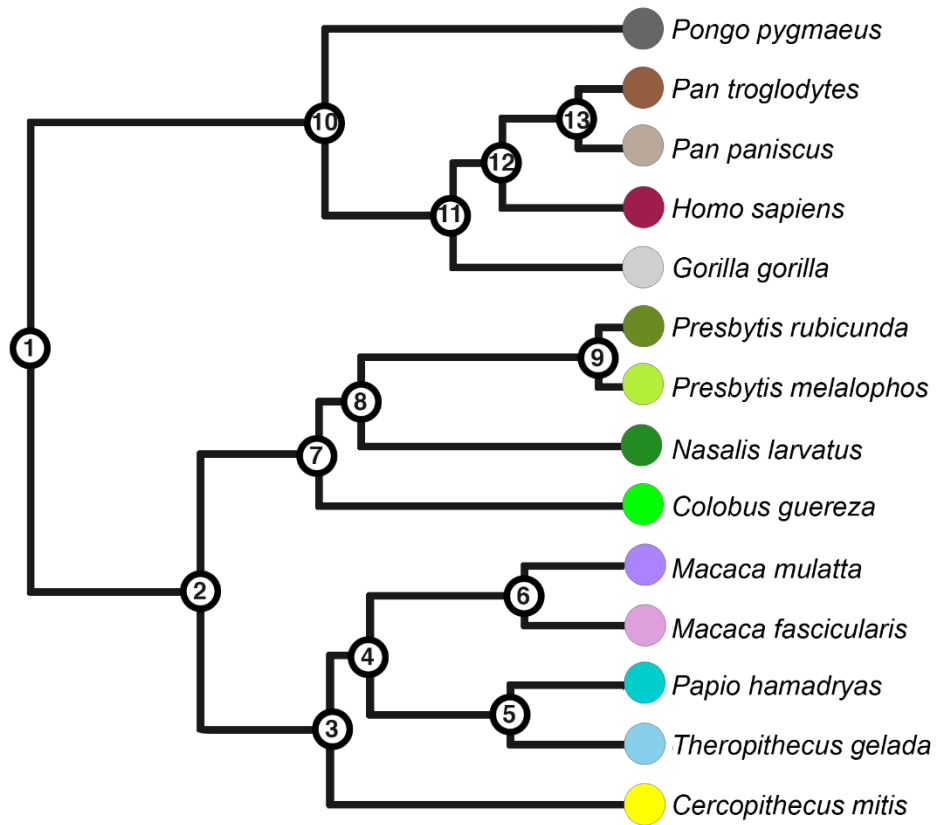

**Fig. S3.** Consensus molecular chronogram used in the phylogenetic analysis. See Supplementary Table 9 for molecular divergence dates and their literary source.

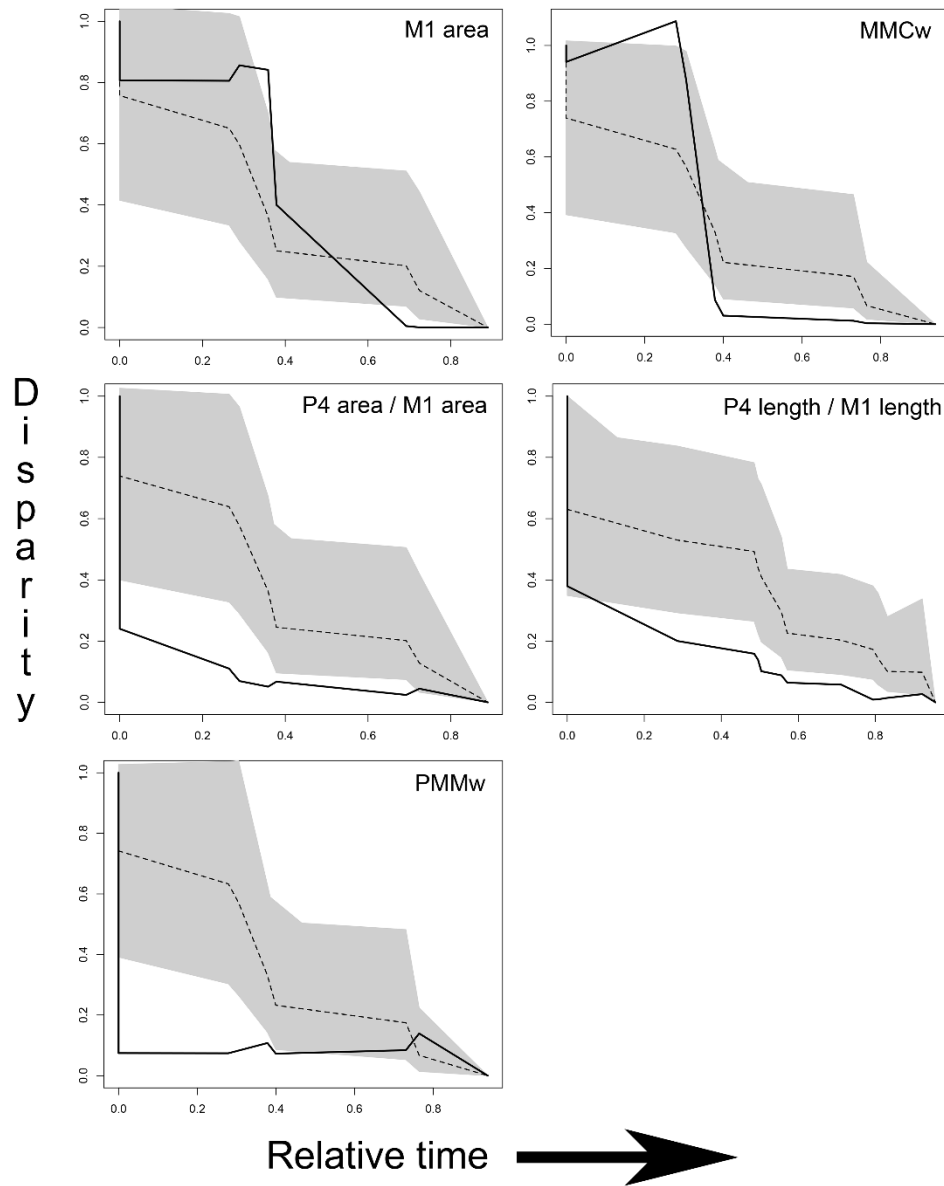

**Fig. S4.** Disparity through time results of dental traits to compare with PMM and MMC presented in Figure 3 of the main text. Dotted lines indicate the predicted disparity values and shaded areas the 95% confidence intervals. Solid lines indicate actual trait values. Values near 0 indicate that a particular clade contains little of the overall variation, and that variation in the trait is partitioned between subclades rather than within them. Values near 1.0 suggest that a clade contains a large amount of that variation, and that clades may overlap in trait space. As shown in Figure 3, PMM and MMC, trait values fall significantly below expected values beginning in the mid-Miocene, indicating trait partitioning between subfamilies within Primates. Two of the traits shown here in the top row yield a similar pattern, but these composite traits include significant pleiotropic effects with body size, and the pattern may well reflect the shift in body size variation rather than possible selection on dental patterns. The other three traits do not vary significantly across the clades.

## Supporting Information, References

1. Frost SR, Alemseged Z (2007) Middle Pleistocene fossil Cercopithecidae from Asbole, Afar Region, Ethiopia. *J Hum Evol* **53**: 227-259.
2. Frost SR, Haile-Selassie Y, Hlusko LJ (2009) in *Ardipithecus kadabba: late Miocene evidence from the Middle Awash, Ethiopia*, Y. Haile-Selassie, G. WoldeGabriel, Eds. (UC Press, Berkeley and Los Angeles, CA), pp. 135-158.
3. Frost SR, Jablonski NG, Haile-Selassie Y (2014) Early Cercopithecidae from Woranso-Mille (Central Afar, Ethiopia) and the origins of the *Theropithecus oswaldi* lineage. *J Hum Evol* **76**: 39-53.
4. Hlusko LJ (2007) A new late Miocene species of *Paracolobus* and other Cercopithecoidea (Mammalia: Primates) fossils from Lemudong'o, Kenya. *Kirtlandia* **56**: 72-85.
5. Benefit BR (1993) The permanent dentition and phylogenetic position of *Victoriapithecus* from Maboko Island, Kenya. *J Hum Evol* **25**: 83-172.
6. Suwa G, *et al.* (2009) Paleobiological implications of the *Ardipithecus ramidus* dentition. *Science* **326**: 69, 94-99.
7. Hartwig WC (2002) *The Primate Fossil Record*. (Cambridge University Press, New York, NY).
8. White TD, Suwa G, Simpson S, Asfaw B (2000) Jaws and teeth of *Australopithecus afarensis* from Maka, Middle Awash, Ethiopia. *Am J Phys Anthropol* **111**: 45-68.
9. Ward CV, Leakey MG, Walker A (2001) Morphology of *Australopithecus anamensis* from Kanapoi and Allia Bay, Kenya. *J Hum Evol* **41**: 255-368.
10. Wood BA (1991) *Koobi Fora Research Project, vol. 4, Hominid Cranial Remains* (Clarendon, Oxford, UK).
11. de Castro JMB, Rosas A, Nicolás ME (1999) Dental remains from Atapuerca-TD6 (Gran Dolina site, Burgos, Spain). *J Hum Evol* **37**: 523-566.
12. Kaifu Y, Aziz F, Baba H (2005) Hominid mandibular remains from Sangiran: 1952-1986 collection. *Am J Phys Anthropol* **128**: 497-519.
13. Walker A, Leakey RE (1993) *The Nariokotome Homo erectus skeleton* (Harvard Univ. Press, Cambridge, MA).
14. Rightmire GP (1990) *The Evolution of Homo erectus. Comparative Anatomical Studies of an Extinct Human Species* (Cambridge Univ. Press, Cambridge, MA).
15. Wood BA, Van Noten FL (1986) Preliminary observations on the BK 8518 mandible from Baringo, Kenya. *Am J Phys Anthropol* **69**: 117-127.
16. Arambourg C, Hoffstetter R (1963) Le gisement de Ternifine II. L' *Atlanthropus mauritanicus*. *Arch Inst Paléontol Humaine* **32**: 37-190.
17. Weidenreich F (1937) The dentition of *Sinanthropus pekinensis*: a comparative odontography of the hominids. *Palaeontol Sin Ser D* **1**: 1-180.
18. Gabunia L, Vekua A (1995) A Plio-Pleistocene hominid from Dmanisi, East Georgia, Caucasus. *Nature* **373**: 509-512.
19. Howell FC (1960) European and northwest African middle Pleistocene hominids. *Curr Anthropol* **1**: 195-232.
20. Quam RM, *et al.* (2001) Human remains from Valdegoba Cave (Huérmeces, Burgos, Spain). *J Hum Evol* **41**: 385-435.
21. Lordkipanidze D, *et al.* (2013) A complete skull from Dmanisi, Georgia, and the evolutionary biology of early *Homo*. *Science* **342**: 326-331.
22. Macaluso P. J. Jr. (2010) Variation in dental remains from Dmanisi, Georgia. *Anthropol Sci* **118**: 31-40.
23. Martín-Torres M, Bermúdez de Castro JM, Gómez-Robles A, Prado-Simón L, Arsuaga JL (2012) Morphological description and comparison of the dental remains from Atapuerca-Sima de los Huesos site (Spain). *J Hum Evol* **62**: 7-58.

24. de Castro JMB (1993) The Atapuerca dental remains. New evidence (1987-1991 excavations) and interpretations. *J Hum Evol* **24**: 339-371.
25. Rossie JB, MacLatchy L (2013) Dentognathic remains of an *Afropithecus* individual from Kalodirr, Kenya. *J Hum Evol* **65**: 199-208.
26. Begun DR, Güleç E (1998) Restoration of the type and palate of *Ankarapithecus meteai*: taxonomic and phylogenetic implications. *Am J Phys Anthropol* **105**: 279-314.
27. Güleç E, Begun DR (2003) Functional morphology and affinities of the hominoid mandible from Çandır. *Cour Forschungsinst Senckenb* **240**: 89-111.
28. Kelley J, Ward S, Brown B, Hill A, Duren DL (2002) Dental remains of *Equatorius africanus* from Kipsaramon, Tugen Hills, Baringo District, Kenya. *J Hum Evol* **42**: 39-62.
29. McCrossin ML, Benefit BR (1993) Recently recovered *Kenyapithecus* mandible and its implications for great ape and human origins. *Proc Natl Acad Sci USA* **90**: 1962-1966.
30. Pickford M (1985) A new look at *Kenyapithecus* based on recent discoveries in western Kenya. *J Hum Evol* **14**: 113-143.
31. Chaimanee Y, *et al.* (2004) A new orang-utan relative from the Late Miocene of Thailand. *Nature* **427**: 439-441.
32. Harrison T (1981) New finds of small fossil apes from the Miocene locality at Koru in Kenya. *J Hum Evol* **10**: 129-137.
33. Le Gros Clark WE (1952) Report on fossil hominoid material collected by the British-Kenya Miocene Expedition, 1949-1951. *P Zool Soc Lond* **122**: 273-286.
34. Koufos GD, de Bonis L (2006) New material of *Ouranopithecus macedoniensis* from late Miocene of Macedonia (Greece) and study of its dental attrition. *Geobios* **39**: 223-243.
35. Le Gros Clark WE, Leakey LSB (1951) *Fossil Mammals of Africa, No. 1: The Miocene Hominoidea of East Africa* (British Museum (Natural History), London).
36. Pickford M, Senut B, Gommery D, Musiime E (2009) Distinctiveness of *Ugandapithecus* from *Proconsul*. *Estud Geol* **65**: 183-241.
37. Martin L (1981) New specimens of *Proconsul* from Koru, Kenya. *J Hum Evol* **10**: 139-150.
38. Cote S, Malit N, Nengo I (2014) Additional mandibles of *Rangwapithecus gordonii*, an early Miocene catarrhine from the Tinderet localities of Western Kenya. *Am J Phys Anthropol* **153**: 341-352.
39. Hill A, Nengo IO, Rossie JB (2013) A *Rangwapithecus gordonii* mandible from the early Miocene site of Songhor, Kenya. *J Hum Evol* **65**: 490-500.
40. Pilbeam D (1982) New hominoid skull material from the Miocene of Pakistan. *Nature* **295**: 232-234.
41. Kelley J, Ward S, Brown B, Hill A, Duren DL (2002) Dental remains of *Equatorius africanus* from Kipsaramon, Tugen Hills, Baringo District, Kenya. *J Hum Evol* **42**: 39-62.
42. Pickford M, Kunimatsu Y (2005) Catarrhines from the Middle Miocene (ca. 14.5 Ma) of Kipsaraman, Tugen Hills, Kenya. *Anthropol Sci* **113**: 189-224.
43. Harrison T, Andrews P (2009) The anatomy and systematic position of the early Miocene proconsulid from Meswa Bridge, Kenya. *J Hum Evol* **56**: 479-496.
44. Perelman P, *et al.* (2011) A molecular phylogeny of living primates. *PLoS Genet* **7**: e1001342.
45. Raaum RL, Sterner KN, Noviello CM, Stewart C-B, Disotell TR (2005) Catarrhine primate divergence dates estimated from complete mitochondrial genomes: concordance with fossil and nuclear DNA evidence. *J Hum Evol* **48**: 237-257.
46. Guschanski K, *et al.* (2013) Next-generation museomics disentangles one of the largest primate radiations. *Syst Biol* **62**: 539-554.
47. Sterner KN, Raaum RL, Zhang Y-P, Stewart C-B, Disotell TR (2006) Mitochondrial data support an odd-nosed colobine clade. *Mol Phylogenet Evol* **40**: 1-7.
48. Tosi AJ, Disotell TR, Morales JC, Melnick DJ (2003) Cercopithecine Y-chromosome data provide a test of competing morphological evolutionary hypotheses. *Mol Phylogenet Evol* **27**: 510-521.



49. Meyer D, Rinaldi ID, Ramlee H, Perwitasari-Farajallah D, Hodges JK, Roos C (2011) Mitochondrial phylogeny of leaf monkeys (genus *Presbytis*, Eschscholtz, 1821) with implications for taxonomy and conservation. *Mol Phylogenet Evol* **59**: 311–319.
50. Zain BM (2001) Molecular systematics of the genus *Presbytis*. PhD dissertation (Columbia Univ, New York, NY).
51. Meijaard E, Groves CP (2004) The biogeographical evolution and phylogeny of the genus *Presbytis*. *Prim Report* **68**: 70–90.
